# Supplementary material
Source: PubMed Central journal article supplement (PMC2917703)
Supplement: mmc1.pdf [file mmc1.pdf]

## Supplemental Data

### Haploinsufficiency of *HDAC4* Causes Brachydactyly

### Mental Retardation Syndrome, with Brachydactyly

### Type E, Developmental Delays, and Behavioral Problems

Stephen R. Williams, Micheala A. Aldred, Vazken M. Der Kaloustian, Fahed Halal, Gordon Gowans, D. Ross McLeod, Sara Zondag, Helga Toriello, R. Ellen Magenis, and Sarah H. Elsea

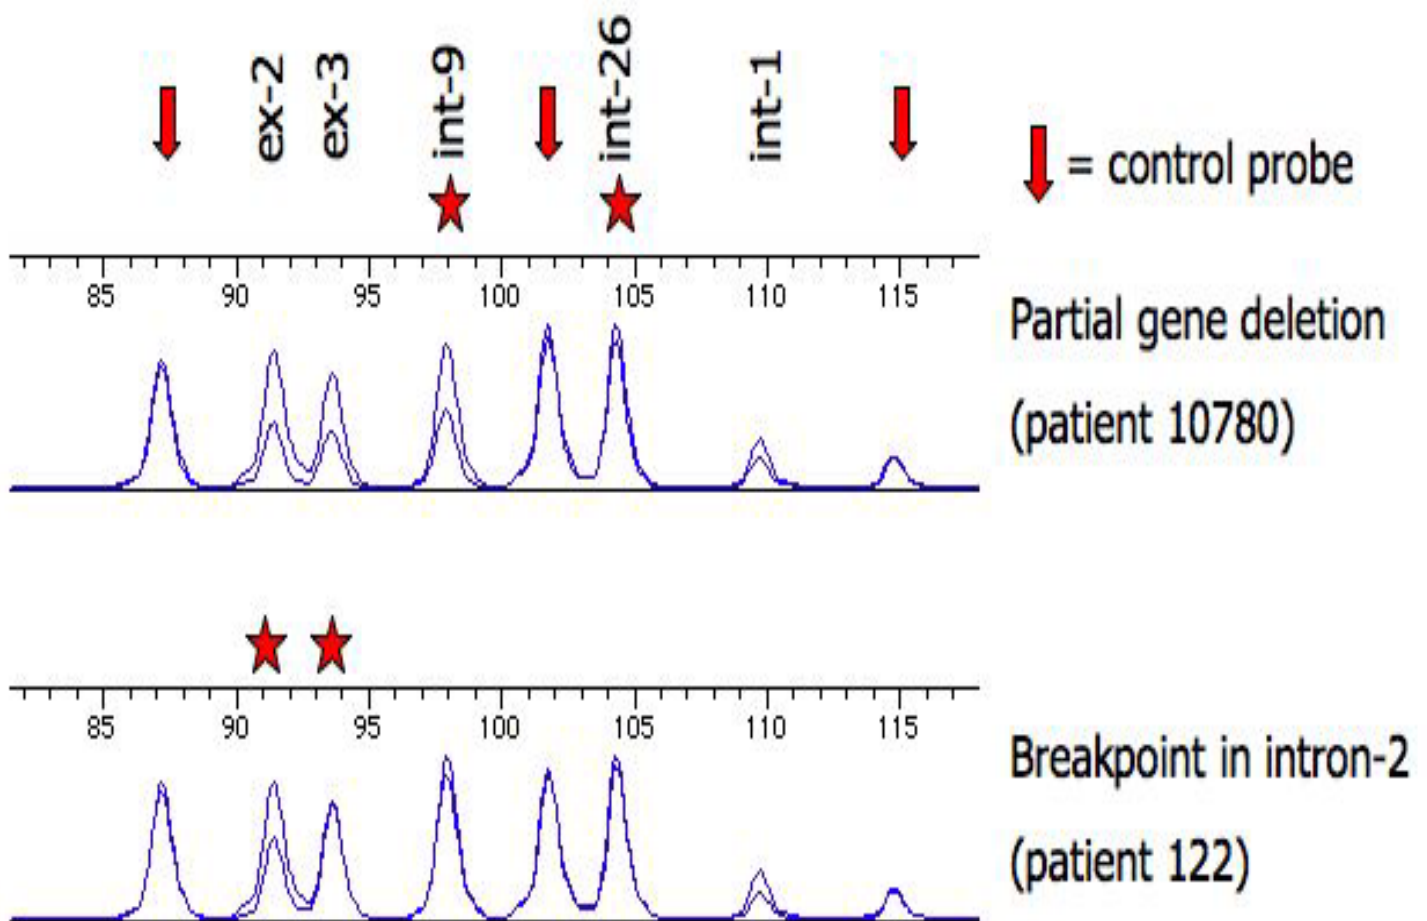

**Figure S1. MLPA analysis of *HDAC4* deletion breakpoints in key 2q37.3 deletions.** *Top:* Analysis of patient 10780 showed an *HDAC4* deletion extending at least through intron 9 but the breakpoint occurring prior to intron 26. *Bottom:* Patient 122 revealed a deletion including intron 1 and exon 2, with the breakpoint occurring between the probes for exon 2 and exon 3. Stars indicate regions between which the breakpoint occurs for each case. Control probes are indicated by the arrows and show 2 alleles of equal intensity for each.

**Table S1. HDAC4 amplification and sequencing oligonucleotides.**

| Exon | Primer | Primer Sequence           | Tm (C) | Amplicon |
|------|--------|---------------------------|--------|----------|
| 1    | 1F     | GGCTCGGCGCTTGAACGTCT      | 64     | 220      |
| 1    | 1R     | TGGGCAAAGAAAGCCCCGCT      | 64     |          |
| 2    | 2F     | TGCGCGCAGTTTCTGAAGCC      | 64     | 214      |
| 2    | 2R     | CCCCTCGCCCTCTCTGCACT      | 64     |          |
| 3    | 3F     | CCAGGGACAGCAAAGGGCGG      | 66     | 376      |
| 3    | 3R     | CGGAGGCAGGGCTGGAGTCA      | 66     |          |
| 4    | 4F     | AGCCCGGAATGGCCCTGACT      | 63     | 654      |
| 4    | 4R     | TACTCCCCGTGTGCTGCCCC      | 63     |          |
| 5    | 5F     | TAGCCGTCCCCAGCCCTTCC      | 64     | 412      |
| 5    | 5R     | CTGCCGCACGAGTGTACCCC      | 64     |          |
| 6    | 6F     | GGGGCAGTGCCTGGGTAAA       | 64     | 285      |
| 6    | 6R     | CTGCAGGTGATTCTTCTCTAAGTGG | 64     |          |
| 7    | 7F     | TGAGCTCCCTGCGCTCTCCC      | 64     | 400      |
| 7    | 7R     | GGGGGTTGACAGCGTGAGGC      | 64     |          |
| 8    | 8F     | GGGCATTCGGGCCACAGGTC      | 64     | 320      |
| 8    | 8R     | AGGCCACTTTCCCTCACCCCA     | 64     |          |
| 9    | 9F     | ATGTTTGGCCGTGACAGACT      | 60     | 219      |
| 9    | 9R     | AAGGACCCATCACCACCAC       | 60     |          |
| 10   | 10F    | AGCATCCTGGCTGTGCTTT       | 58     | 242      |
| 10   | 10R    | CCAGGCCCATTTGTGCTC        | 58     |          |
| 11   | 11F    | TTCCCCTCTGCTGTTTCTTC      | 58     | 398      |
| 11   | 11R    | GTTCCCTCTTCTGCCTCCT       | 58     |          |
| 12   | 12F    | GACCCAGCTCTCTGTGCTTC      | 60     | 377      |
| 12   | 12R    | ACCACAGAAGATGCCACCTG      | 60     |          |
| 13   | 13F    | CAACACGGCCGTTTCTTC        | 60     | 243      |
| 13   | 13R    | ACCCTCAGGCTGCACAAA        | 60     |          |
| 14   | 14F    | ATGACACGCTGATGCTGAAG      | 58     | 237      |
| 14   | 14R    | TAAGCCCAAAGAACCACCTG      | 58     |          |
| 15   | 15F    | CTGTCTGTGGAGCTGAAGCA      | 60     | 222      |
| 15   | 15R    | ACCCAATATGGGAGGAAAGG      | 60     |          |
| 16   | 16F    | CCTCGTTGTCCACAAAATG       | 58     | 220      |
| 16   | 16R    | ACCACTGGGACTCGAGAAGA      | 58     |          |
| 17   | 17F    | TCACTGTGGGGTGTGTTTC       | 58     | 232      |
| 17   | 17R    | CAGCCTGATGAGAGGGAGAC      | 58     |          |
| 18   | 18F    | AGGGTGCAGCAAGAACTGT       | 58     | 245      |
| 18   | 18R    | CCTAAGGGAGGGAAGGAAGA      | 58     |          |
| 19   | 19F    | CTCCAGCGTCAGTTCTCTCC      | 60     | 223      |
| 19   | 19R    | CCTAAGCTTCCACATCCAA       | 60     |          |
| 20   | 20F    | TGCCCTCAGCCCTGAAGTAGT     | 60     | 179      |
| 20   | 20R    | GGCCCTTATATACCCACCT       | 60     |          |
| 21   | 21F    | CGTGTGTTTCTCTCCTTCTGG     | 60     | 215      |
| 21   | 21R    | GACACGCTCATCTCCAACAA      | 60     |          |
| 22   | 22F    | ACCCAGTAACGCCTTCTCCT      | 60     | 234      |
| 22   | 22R    | TAAAAAGGGGACCTGACACG      | 60     |          |
| 23   | 23F    | TCTTACGATGCCATGAGACG      | 60     | 242      |
| 23   | 23R    | GGTCTCTGGGGTCTTCTTA       | 60     |          |
| 24   | 24F    | GTCTCGGAACACCCGTCTAA      | 60     | 240      |
| 24   | 24R    | GTATAGGGGGACAGGGATGG      | 60     |          |
| 25   | 25F    | ACTTTCCTCACCCACCAC        | 60     | 246      |
| 25   | 25R    | GGTCTGACCCTGAATAGTGTG     | 60     |          |
| 26   | 26F    | CACAGCCTTTAACCCACGTT      | 60     | 183      |
| 26   | 26R    | TGGCTGAGCTTCAAGACAGA      | 60     |          |

**Table S2. HDAC4 cDNA oligonucleotides for amplification and sequencing.**

| <b>Coding exon (cDNA)</b> | <b>Primer</b>        | <b>Sequence</b>       | <b>Tm</b> | <b>Amplicon (bp)</b> |
|---------------------------|----------------------|-----------------------|-----------|----------------------|
| 1-8                       | cDNA 1F              | GAGTTTGGAGCTCGTTGGAG  | 56        | 1135                 |
| 1-8                       | cDNA 1R              | AAGGATGGCGATGTGTAGAGG | 56        |                      |
| 1-8                       | Sequencing Primer 1F | GCAGCTCAAGAACAAGGAG   | NA        | NA                   |
| 1-8                       | Sequencing Primer 1R | CTCTTTGCCCTTCTCCTTGTC | NA        | NA                   |

**Table S3. MLPA probes for 2q37.3 and HDAC4.**

| <b>Name</b> | <b>Sequence</b>                                                | <b>Ensembl Build 41</b> |
|-------------|----------------------------------------------------------------|-------------------------|
| rs870790A   | <b>GGGTTCCCTAAGGGTTGGATTCTTAGGACCTGAAAGTCTGAACCAGCATTCCAA</b>  | 239980739               |
| rs870790B   | <b>GTGGGAGTATTGTTCAAGCGGTGATGGAATTGTCTAGATTGGATCTTGCTGGCAC</b> | 239980805               |
| HDAC4-2A    | <b>GGGTTCCCTAAGGGTTGGAGAGGCTCGGCGCTTGAACGTCTG</b>              | 239939431               |
| HDAC4-2B    | <b>TGACCCAGCCCTCACCGTCCCGGTACTCTAGATTGGATCTTGCTGGCAC</b>       | 239939479               |
| HDAC4-3A    | <b>GGGTTCCCTAAGGGTTGGATGGCCGAGACCAGCCAGTGGAGCTG</b>            | 239823237               |
| HDAC4-3B    | <b>CTGAATCCTGCCCGCGTGAACCACATTCTAGATTGGATCTTGCTGGCAC</b>       | 239823287               |
| HDAC4-i9A   | <b>GGGTTCCCTAAGGGTTGGAGCACTTGCCCTTCACTCTTACCTTCCA</b>          | 239726184               |
| HDAC4-i9B   | <b>ATTTGGGGTGAGGGAAAGTGGCCTGTGTCTAGATTGGATCTTGCTGGCAC</b>      | 239726238               |
| HDAC4-i26A  | <b>GGGTTCCCTAAGGGTTGGACTCCTTCCAGTGCCAAAGCCCCTTAGAGAC</b>       | 239639900               |
| HDAC4-i26B  | <b>GCATGAGGAGCATTAGATCCTGAACAGATGGATCTAGATTGGATCTTGCTGGCAC</b> | 239639961               |
